# Supplementary material for: Biomedical Science Ph.D. Career Interest Patterns by Race/Ethnicity and Gender
Source: PLoS One. 2014 Dec 10;9(12):e114736. doi: 10.1371/journal.pone.0114736 (PMC4262437; doi:10.1371/journal.pone.0114736)
Supplement: S1 Table — Ph.D. granting institutions of biomedical science Ph.D. survey respondents. (XLSX) [file pone.0114736.s002.xlsx]

## Sheet: Table S1. Institutions
Table S1. Ph.D. granting institutions of survey respondents, and the number respondents from each.
Ph.D. Granting Institution	N	Percent	Top 50 University
University of Minnesota	70	4.67	Yes
University of California, San Francisco	62	4.13	Yes
Stanford University	61	4.07	Yes
Washington University in St. Louis	61	4.07	Yes
University of Michigan	50	3.33	Yes
International Institution	49	3.27
Johns Hopkins (All Campuses)	47	3.13	Yes
University of Washington	42	2.8	Yes
University of Pennsylvania (UPenn)	38	2.53	Yes
Yale University	37	2.47	Yes
Harvard University (All Campuses)	35	2.33	Yes
University of North Carolina, Chapel Hill	30	2	Yes
Vanderbilt University	28	1.87	Yes
Duke University	25	1.67	Yes
Columbia University	24	1.6	Yes
University of California, Davis	24	1.6	Yes
University of Wisconsin, Madison	24	1.6	Yes
Emory University	23	1.53
University of California, Berkeley	22	1.47	Yes
University of California, San Diego	22	1.47	Yes
University of Virginia	21	1.4
Cornell University	17	1.13	Yes
Northwestern University	17	1.13	Yes
Pennsylvania State University (All Campuses)	15	1	Yes
The Ohio State University (OSU)	15	1	Yes
University of Illinois, Urbana-Champaign	15	1	Yes
University of Iowa	15	1
Baylor College of Medicine	14	0.93	Yes
University of Chicago	13	0.87	Yes
University of Southern California	12	0.8	Yes
SUNY Stony Brook (Stony Brook University)	11	0.73
Texas A&M University	11	0.73	Yes
University of Arizona	11	0.73	Yes
University of Georgia	11	0.73
University of Kansas	11	0.73
University of Texas, Austin	11	0.73	Yes
Decline To State	11	0.73
University of Texas, Health Science Center, Houston	10	0.67
Wake Forest University	10	0.67
Boston University	9	0.6
Brandeis University	9	0.6
University of Alabama, Birmingham	9	0.6	Yes
University of California, Los Angeles	9	0.6	Yes
University of Texas, Southwestern Medical Center, Dallas	9	0.6	Yes
Virginia Commonwealth University	9	0.6
Brown University	8	0.53
University of California, Irvine	8	0.53
University of Florida	8	0.53	Yes
University of Massachusetts, Amherst	8	0.53
Case Western Reserve University	7	0.47	Yes
Mayo Clinic	7	0.47
University of Cincinnati	7	0.47
University of Kentucky	7	0.47	Yes
University of Maryland, Baltimore	7	0.47
University of Pittsburgh	7	0.47	Yes
Albert Einstein College of Medicine	6	0.4
Drexel University	6	0.4
Louisiana State University	6	0.4	Yes
Massachusetts Institute of Technology (MIT)	6	0.4	Yes
New York University (NYU)	6	0.4
North Carolina State University	6	0.4	Yes
Oregon Health & Science University (OHSU)	6	0.4
Princeton University	6	0.4
Purdue University	6	0.4	Yes
Thomas Jefferson University	6	0.4
Tufts University	6	0.4
University of California, Riverside	6	0.4
University of California, Santa Barbara	6	0.4
University of Connecticut	6	0.4
University of Colorado, Denver (Anschutz Medical Campus)	6	0.2	Yes
University of Delaware	6	0.4
Weill Medical College of Cornell University	6	0.4
Georgia Institute of Technology (Georgia Tech)	5	0.33	Yes
Indiana University	5	0.33	Yes
Michigan State University	5	0.33
Rutgers University	5	0.33
Tulane University	5	0.33
University of Illinois, Chicago	5	0.33
University of New Mexico	5	0.33
University of South Florida	5	0.33
Virginia Polytechnic Institute and State University (Virginia Tech)	5	0.33	Yes
California Institute of Technology (Cal Tech)	4	0.27
Georgia Health Sciences University	4	0.27
Medical University of South Carolina	4	0.27
Mount Sinai School of Medicine	4	0.27
University of Alabama	4	0.27
University of California, Santa Cruz	4	0.27
University of Colorado, Boulder	4	0.27	Yes
University of Louisville	4	0.27
University of South Alabama	4	0.27
East Carolina University	3	0.2
Georgetown University	3	0.2
Kent State University	3	0.2
Loyola University, Chicago	3	0.2
Meharry Medical College	3	0.2
Ponce School of Medicine and Health Sciences	3	0.2
Rice University	3	0.2
Rockefeller University	3	0.2
Saint Louis University	3	0.2
SUNY Buffalo (University at Buffalo)	3	0.2
University of Maryland, Baltimore County	3	0.2
University of Massachusetts, Medical School	3	0.2
University of Miami	3	0.2
University of Missouri, Columbia	3	0.2
University of Nebraska, Medical Center	3	0.2
University of Notre Dame	3	0.2
University of Oklahoma Health Sciences	3	0.2
University of Oregon	3	0.2
University of Puerto Rico (All Campuses)	3	0.2
University of Rochester	3	0.2	Yes
University of Tennessee	3	0.2
University of Utah	3	0.2
Wayne State University	3	0.2
Albany Medical College	2	0.13
Colorado State University	2	0.13
Dartmouth College	2	0.13
George Mason University	2	0.13
Howard University	2	0.13
Lehigh University	2	0.13
Ohio University	2	0.13
SUNY Albany (University at Albany)	2	0.13
SUNY Binghamton (Binghamton University)	2	0.13
SUNY Upstate Medical University	2	0.13
The City University of New York (CUNY)	2	0.13
University of Arkansas for Medical Sciences	2	0.13
University of Houston	2	0.13
University of Maryland, College Park	2	0.13	Yes
University of Nebraska, Lincoln	2	0.13
University of North Dakota	2	0.13
University of South Carolina, Columbia	2	0.13
University of Tennessee, Health Science	2	0.13
University of Texas, Dallas	2	0.13
University of Texas, Medical Branch (Galveston)	2	0.13
University of Vermont	2	0.13
Washington State University	2	0.13
Watson School of Biological Sciences	2	0.13
Alliant International University	1	0.07
American University	1	0.07
Arizona State University	1	0.07
Auburn University	1	0.07
Bowling Green State University	1	0.07
Brigham Young University	1	0.07
Carlos Albizu University	1	0.07
Carnegie Mellon University	1	0.07
Catholic University	1	0.07
Creighton University	1	0.07
Florida A&M University	1	0.07
Florida Atlantic University	1	0.07
Florida State University	1	0.07
Forest Institute	1	0.07
Idaho State University	1	0.07
Iowa State University	1	0.07
Marquette University	1	0.07
Miami University, Ohio	1	0.07
Montana State University, Bozeman	1	0.07
New Mexico State University	1	0.07
North Dakota State University	1	0.07
Northeastern University	1	0.07
Northern Arizona University	1	0.07
Old Dominion University	1	0.07
Oregon State University	1	0.07
Rosalind Franklin University of Medicine	1	0.07
Southern Illinois University	1	0.07
Spelman College	1	0.07
SUNY Downstate	1	0.07
Temple University	1	0.07
The Scripps Research Institute	1	0.07	Yes
University of Akron	1	0.07
University of California, Merced	1	0.07
University of Maine	1	0.07
University of Mississippi, Medical Center	1	0.07
University of Missouri, St. Louis	1	0.07
University of Montana, Missoula	1	0.07
University of New Hampshire	1	0.07
University of North Carolina, Greensboro	1	0.07
University of Southern Mississippi	1	0.07
University of Texas, Health Science Center, San Antonio	1	0.07
University of Texas, M.D. Anderson Cancer Center	1	0.07	Yes
University of Wyoming	1	0.07
Wesleyan University	1	0.07
West Virginia University	1	0.07
Western Michigan University	1	0.07
Widener University	1	0.07
Wright State University	1	0.07
Yeshiva University	1	0.07
Total	1500	100
