# Supplementary material for: Biomedical Science Ph.D. Career Interest Patterns by Race/Ethnicity and Gender
Source: PLoS One. 2014 Dec 10;9(12):e114736. doi: 10.1371/journal.pone.0114736 (PMC4262437; doi:10.1371/journal.pone.0114736)
Supplement: S2 Table — Current positions of biomedical science Ph.D. survey respondents. (XLSX) [file pone.0114736.s003.xlsx]

## Sheet: Table S2. Current Position
Table S2. Current positions of biomedical science Ph.D. survey respondents
Position	Percent	N
Postdoc	66.8	1003
Non-Research Career (i.e. science policy, science communication, business, consulting, patent law, technology transfer)	9.2	138
Research Scientist/Engineer	5.67	85
Tenure-track Professor	4.13	62
Academic Position, other than tenure-track professor	4.13	62
Other	7.53	113
Unknown/Unemployed	2.47	37
Total		1500
