# Supplementary material for: Biomedical Science Ph.D. Career Interest Patterns by Race/Ethnicity and Gender
Source: PLoS One. 2014 Dec 10;9(12):e114736. doi: 10.1371/journal.pone.0114736 (PMC4262437; doi:10.1371/journal.pone.0114736)
Supplement: S3 Table — Ph.D. disciplines of biomedical science survey respondents. (XLSX) [file pone.0114736.s004.xlsx]

## Sheet: Table S3. PhD Discipline
Table S3. Ph.D. Disciplines of biomedical science survey respondents
Subdiscipline	Percent	N
Biochemistry & Cell/Molecular Biology	30	450
Neuroscience	13.2	198
Microbiology & Immunology	12.7333	191
Pharmacology/Toxicology	7.4	111
Psychology	7.4	111
Biological Sciences	7.2	108
Genetics	5.33333	80
Biostatistics, Epidemiology, Public Health, Clinical Sciences	4.86667	73
Bioengineering	4.73333	71
Biomedical Sciences	3.86667	58
Pathology	1.66667	25
Bioinformatics	1.6	24
