# Supplementary material for: Biomedical Science Ph.D. Career Interest Patterns by Race/Ethnicity and Gender
Source: PLoS One. 2014 Dec 10;9(12):e114736. doi: 10.1371/journal.pone.0114736 (PMC4262437; doi:10.1371/journal.pone.0114736)
Supplement: S4 Table — Multiple logistic regression showing factors associated with biomedical graduates reporting high interest in each career pathway at Ph.D. completion (taking into account current position). Adjusted Odds Ratios (and 95% Confidence Interval) Shown. (XLSX) [file pone.0114736.s005.xlsx]

## Sheet: Table S4. Regression_CP
Table S4. Multiple logistic regression showing factors associated with biomedical graduates reporting high interest in each career pathway at Ph.D. completion.
Adjusted Odds Ratios (and 95% Confidence Interval) Shown.
		Career Pathway
Covariate Class	Covariate	Faculty, Research Intensive	Faculty, Teaching Intensive	Research Career, non-academic	Non-Research Career
Social Identity	Well represented, Male (WRM)	Reference	Reference	Reference	Reference
	Underrepresented Minority, Male (URMM)	0.60 (0.41-0.89)*	0.88 (0.46-1.65)	1.13 (0.70-1.82)	1.03 (0.50-2.10)
	Well represented, Female (WRF)	0.62 (0.44-0.86)*	1.11 (0.80-1.53)	1.02 (0.76-1.37)	1.00 (0.72-1.37)
	Underrepresented Minority, Female (URMF)	0.46 (0.30-0.71)**	1.08 (0.67-1.74)	0.82 (0.50-1.33)	1.95 (1.24-3.04)*
Current Position	Postdoc	Reference	Reference	Reference	Reference
	Tenure-track Professor	1.16 (0.67-2.00)	3.84 (1.97-7.46)**	0.31 (0.15-0.63)**	0.43 (0.20-0.90)*
	Academic, other	0.36 (0.20-0.66)**	1.39 (0.67-2.87)	0.28 (0.14-0.54)**	1.18 (0.68-2.08)
	Research Scientist/Engineer	0.17 (0.08-0.35)**	0.31 (0.16-0.60)**	2.71 (1.59-4.63)**	1.87 (1.14-3.09)*
	Non-research (science policy, communication, law, business)	0.16 (0.10-0.24)**	0.18 (0.09-0.35)**	0.37 (0.24-0.58)**	8.55 (5.02-14.54)**
	Other	0.28 (0.16-0.48)	0.32 (0.17-0.59)**	0.60 (0.39-0.93)*	2.77 (1.57-4.89)**
	Unknown/Unemployed	0.38 (0.13-1.11)	0.52 (0.20-1.35)	1.49 (0.70-3.12)	3.91 (1.62-9.40)*
Personal Disposition	High Career Pathway Interest at Ph.D. Entry	6.02 (4.27-8.48)**	8.28 (6.23-11.01)**	5.11 (3.89-6.73)**	11.21 (7.57-16.61)**
	Intention to Pursue Faculty Career at Ph.D. Entry	1.13 (0.99-1.28)	1.22 (1.07-1.38)*	0.88 (0.80-0.98)*	0.93 (0.82-1.05)
	Confidence in Ability as Independent Researcher	1.64 (1.39-1.93)**	0.79 (0.67-0.93)*	1.11 (0.96-1.28)	0.79 (0.69-0.89)**
Objective/Performance	First-Author Publication Rate	2.39 (1.50-3.78)**	0.99 (0.61-1.60)	0.93 (0.59-1.45)	0.64 (0.42-0.96)*
	h-index	1.01 (0.98-1.04)	1.00 (0.96-1.05)	1.03 (0.99-1.07)	0.95 (0.91-0.99)*
	Time-to-Ph.D.	0.96 (0.83-1.11)	1.03 (0.89-1.19)	1.03 (0.89-1.18)	1.01 (0.90-1.14)
	Ph.D. at Top 50 Research University	0.69 (0.51-0.93)*	1.09 (0.82-1.46)	0.79 (0.62-1.02)	0.99 (0.76-1.30)
Graduate Training Experiences (Sense of Belonging, Advisor Support, Career Development)	Intellectual Belonging, Research Group	1.31 (1.02-1.68)*	0.99 (0.78-1.25)	1.04 (0.82-1.33)	1.14 (0.92-1.41)
	Social Belonging, Research Group	1.00 (0.82-1.21)	0.94 (0.77-1.15)	0.98 (0.82-1.33)	0.99 (0.84-1.16)
	Intellectual Belonging, Department	0.89 (0.76-1.06)	1.07 (0.86-1.31)	0.93 (0.80-1.08)	0.94 (0.76-1.15)
	Social Belonging, Department	1.09 (0.91-1.30)	1.10 (0.93-1.32)	1.12 (0.97-1.30)	1.05 (0.89-1.26)
	Graduate advisor invested in career advancement	1.25 (1.08-1.44)*	1.05 (0.91-1.22)	0.88 (0.76-1.02)	0.99 (0.86-1.13)
	Graduate advisor equally supportive of students pursuing academic & non-academic career paths	0.99 (0.88-1.11)	0.84 (0.73-0.96)*	1.10 (0.98-1.24)	0.88 (0.78-0.98)*
	Department offered structured career development	1.01 (0.88-1.16)	1.13 (0.98-1.29)	0.91 (0.80-1.04)	0.93 (0.81-1.06)
	Department equally supportive of students pursuing academic & non-academic career paths	1.22 (1.04-1.44)*	1.12 (0.96-1.30)	1.10 (0.96-1.27)	0.99 (0.83-1.17)
		*p<0.05	**p<0.001
